# Supplementary material for: MAPE-ViT: multimodal scene understanding with novel wavelet-augmented Vision Transformer
Source: PeerJ journal article supplement (doi:10.7717/peerj-cs.2796), 2025-05-23

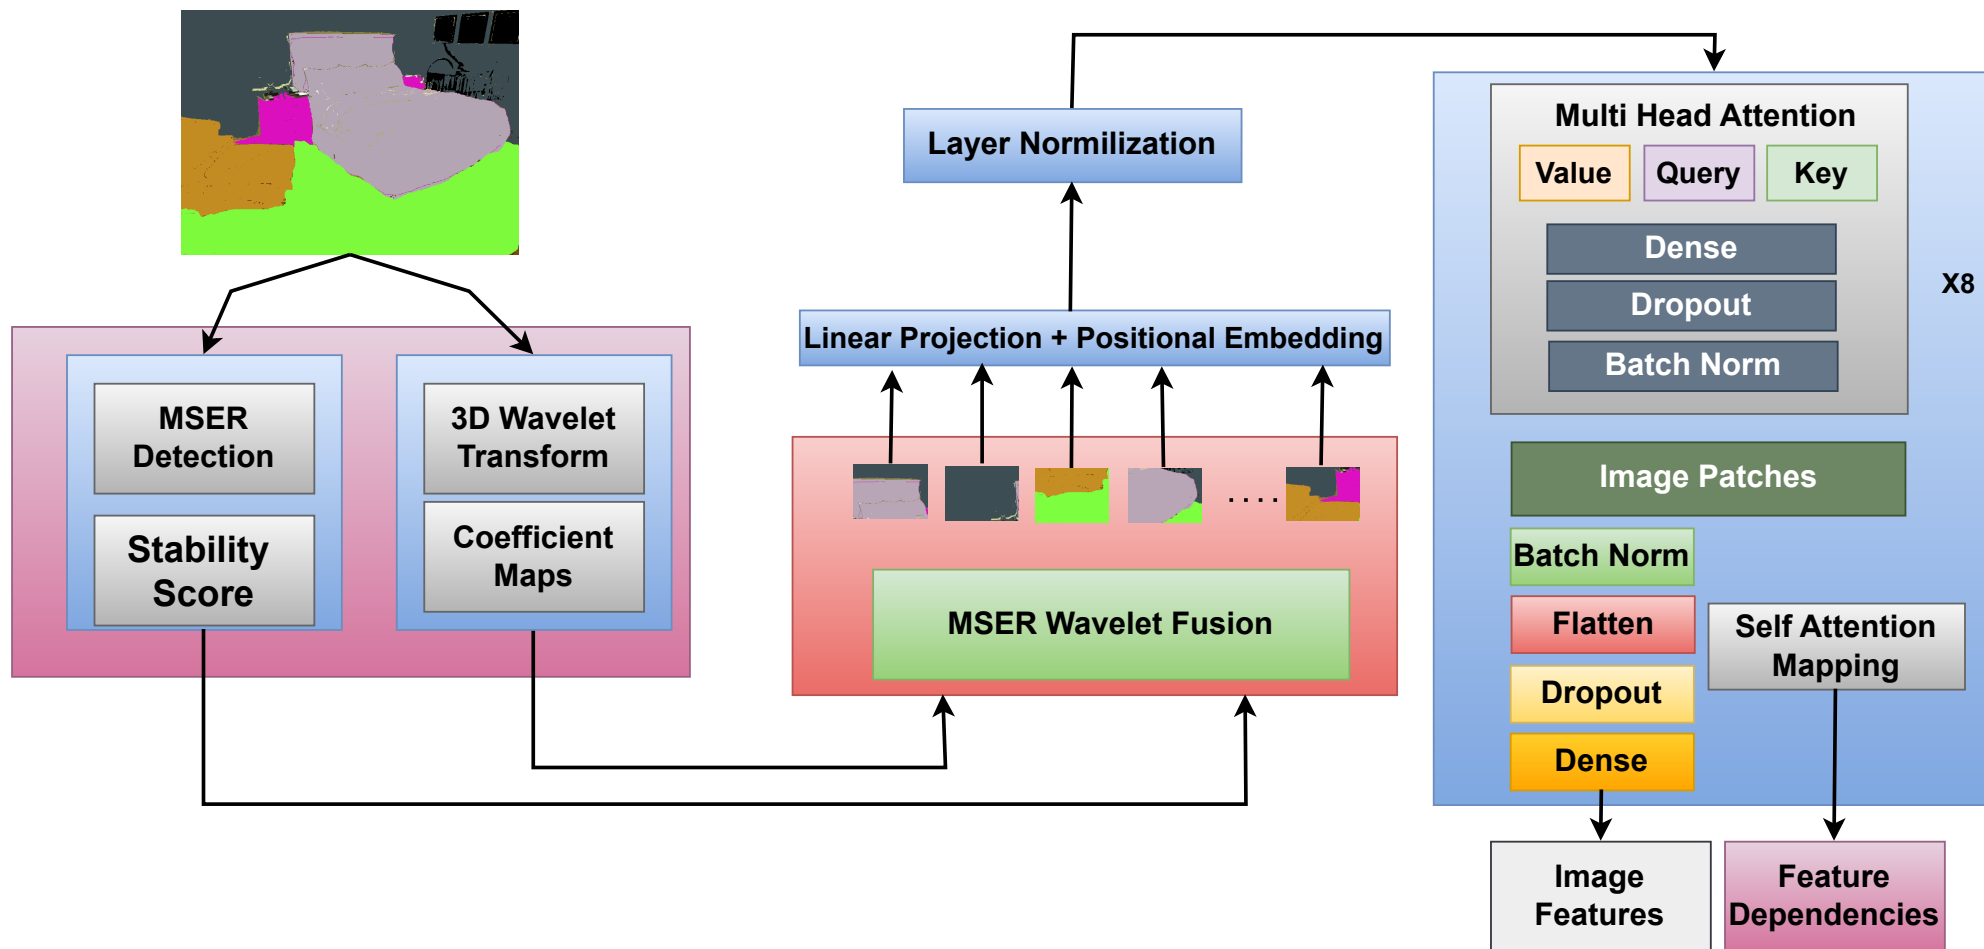

Supplement: FigureS1.pdf [file FigureS1.pdf]
