# Supplementary material for: MAPE-ViT: multimodal scene understanding with novel wavelet-augmented Vision Transformer
Source: PeerJ journal article supplement (doi:10.7717/peerj-cs.2796), 2025-05-23
Supplement: FigureS2.pdf [file FigureS2.pdf]

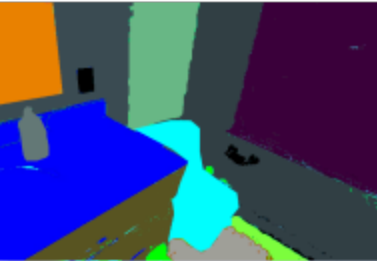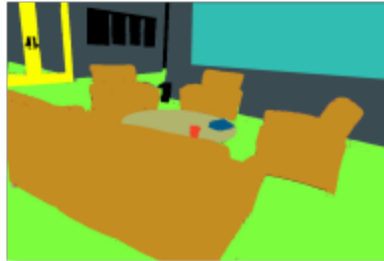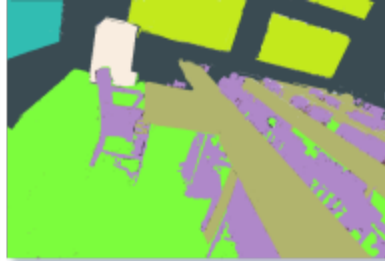

Basin

Chair

Wall

Towel

Cup

Mirror

Floor

Board

Sofa

Dice

Table

Book

Door

Window

Commode
